# Supplementary material for: Associations between the neighbourhood food environment, neighbourhood socioeconomic status, and diet quality: An observational study
Source: PubMed Central journal article supplement (PMC5025628; doi:10.1186/s12889-016-3631-7), 2016-09-15
Supplement: 12889_2016_3631_MOESM1_ESM.pdf [file 12889_2016_3631_MOESM1_ESM.pdf]

**Additional file 1**

Table S1: Principle Component Analysis results, and inter-item correlation estimates, for administrative boundary level census-derived socioeconomic status

| <b>Socioeconomic variable (n=7)</b>                                                                                                                                                                                                                                                                                                                                                                    | <b>Component loading**</b> | <b>Corrected inter-item correlation</b> |
|--------------------------------------------------------------------------------------------------------------------------------------------------------------------------------------------------------------------------------------------------------------------------------------------------------------------------------------------------------------------------------------------------------|----------------------------|-----------------------------------------|
| Proportion of single-parent families                                                                                                                                                                                                                                                                                                                                                                   | 0.827                      | 0.719                                   |
| Gross median household income*                                                                                                                                                                                                                                                                                                                                                                         | 0.755                      | 0.639                                   |
| Proportion of divorced, separated, or widowed among those $\geq 15$ years of age                                                                                                                                                                                                                                                                                                                       | 0.743                      | 0.542                                   |
| Average value of dwellings*                                                                                                                                                                                                                                                                                                                                                                            | 0.725                      | 0.388                                   |
| Proportion with no high school diploma, certificate, or degree among those 25-64 years of age                                                                                                                                                                                                                                                                                                          | 0.699                      | 0.581                                   |
| Proportion of rented private dwellings                                                                                                                                                                                                                                                                                                                                                                 | 0.654                      | 0.542                                   |
| Proportion unemployed among those $\geq 25$ years of age                                                                                                                                                                                                                                                                                                                                               | 0.508                      | 0.388                                   |
| Note that all variables were converted to z-scores prior to analysis.<br>*Reverse coded.<br>**Kaiser-Meyer-Olkin Measure of Sampling Adequacy=0.78; Bartlett's Test of Sphericity $p < .001$ ;<br>Eigenvalue (1 <sup>st</sup> component)=3.51; percent of variance = 50.08%<br>Internal reliability of socioeconomic status deprivation index (based on sum of all 7 variables): Cronbach's alpha=0.83 |                            |                                         |
